# Supplementary material for: Tailored design, synthesis, and catalytic aspects of mononuclear cis-dichloro copper(ii) complexes with simple DPA-derived tridentate ligands and their biomimicking activities
Source: Royal Society of Chemistry journal article supplement (doi:10.1039/d3nj05740b), 2024-01-01
Supplement: d3nj05740b1.pdf [file d3nj05740b1.pdf]

### Supporting Information

#### **Tailored design, synthesis, and catalytic aspects of mononuclear *cis*- dichloro copper(II) complexes with simple DPA derived tridentate ligands and their biomimicking activities**

Arabinda Muley,<sup>†</sup> Kalai Selvan Karumban,<sup>†</sup> Sadananda Kumbhakar, Shobhit Mathur, Indrajit Roy, Anushka Verma, Manoj Kumar Kumawat and Somnath Maji\*

*Department of Chemistry, Indian Institute of Technology Hyderabad, Kandi, Sangareddy 502284, Telangana, India*

<sup>†</sup>These authors contributed equally to this work.

Email address: [smaji@chy.iith.ac.in](mailto:smaji@chy.iith.ac.in) (Somnath Maji)

\*Corresponding author

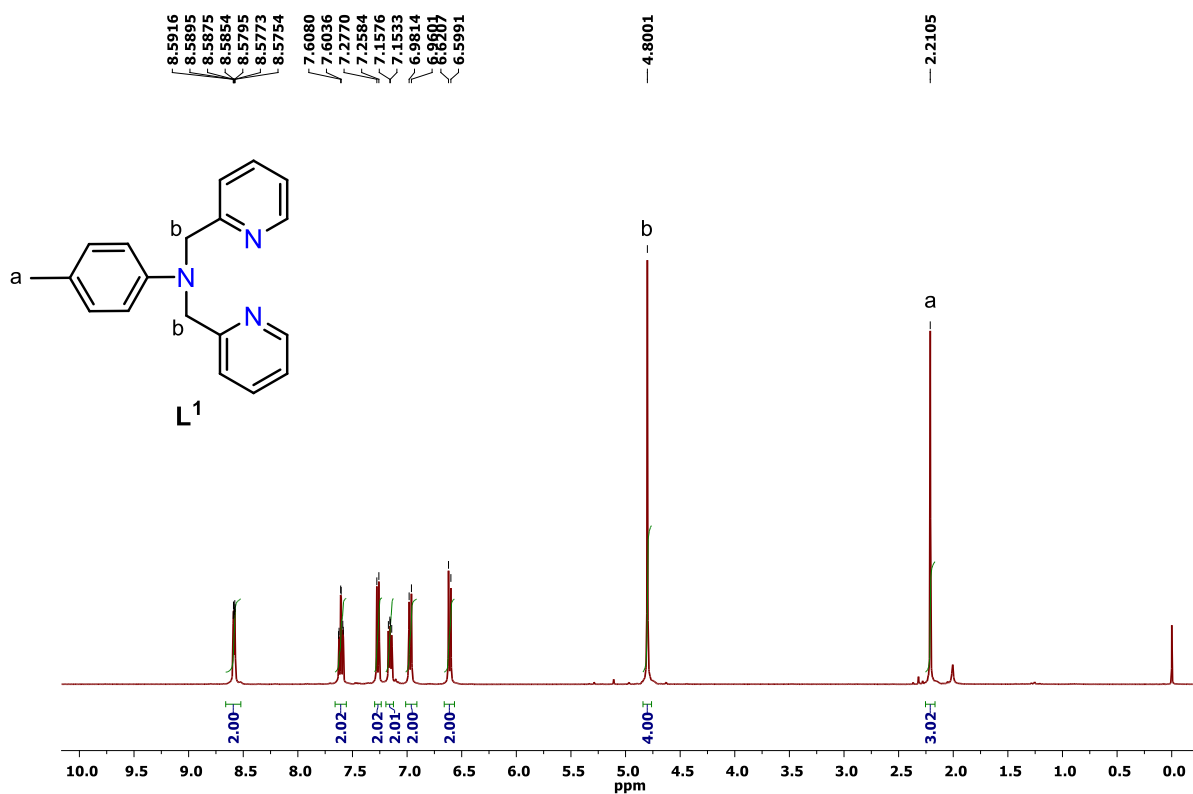

**Fig. S1.** <sup>1</sup>H NMR of **L<sup>1</sup>** in CDCl<sub>3</sub> at room temperature.

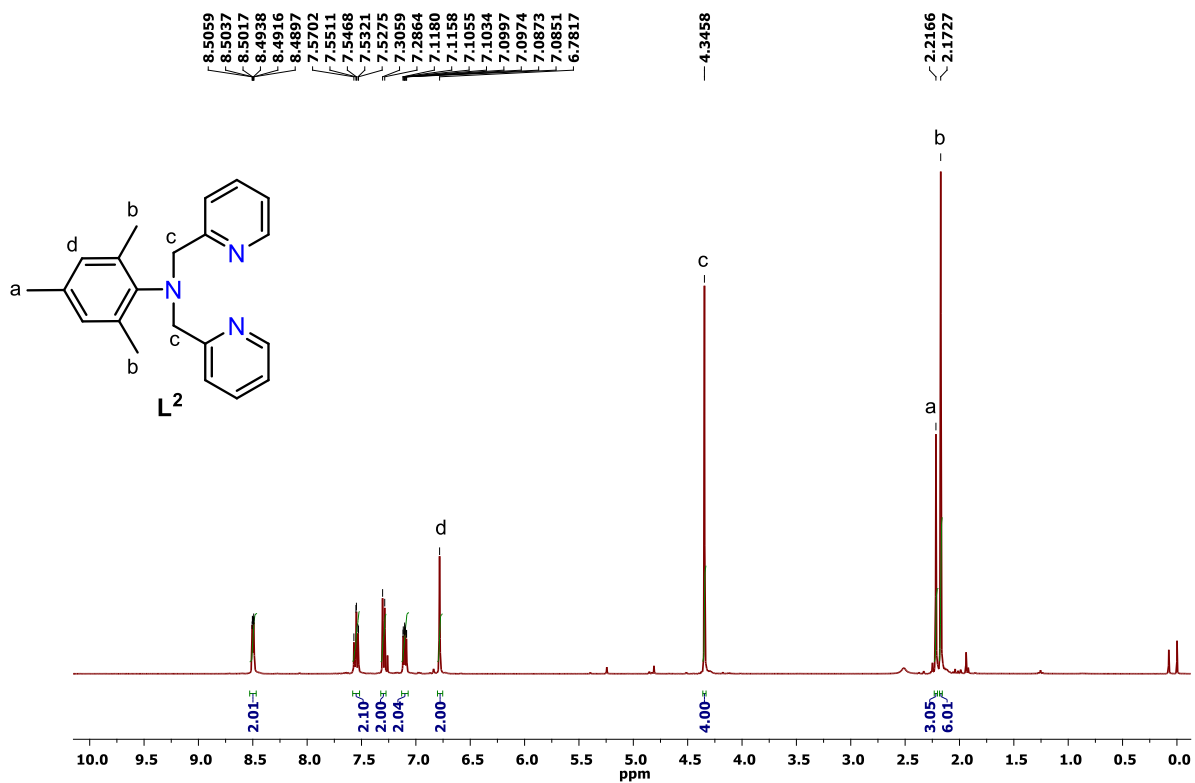

**Fig. S2.** <sup>1</sup>H NMR of **L<sup>2</sup>** in CDCl<sub>3</sub> at room temperature.

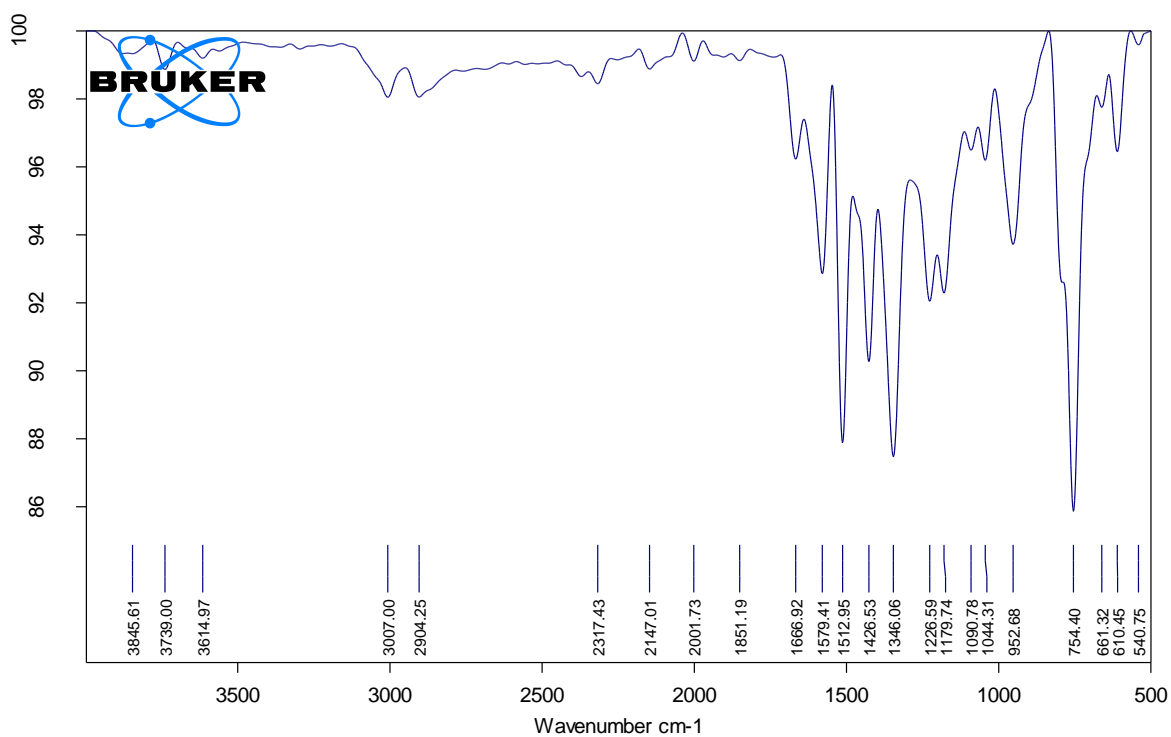

**Fig. S3.** FT-IR (Solid) spectrum of **L<sup>1</sup>**.

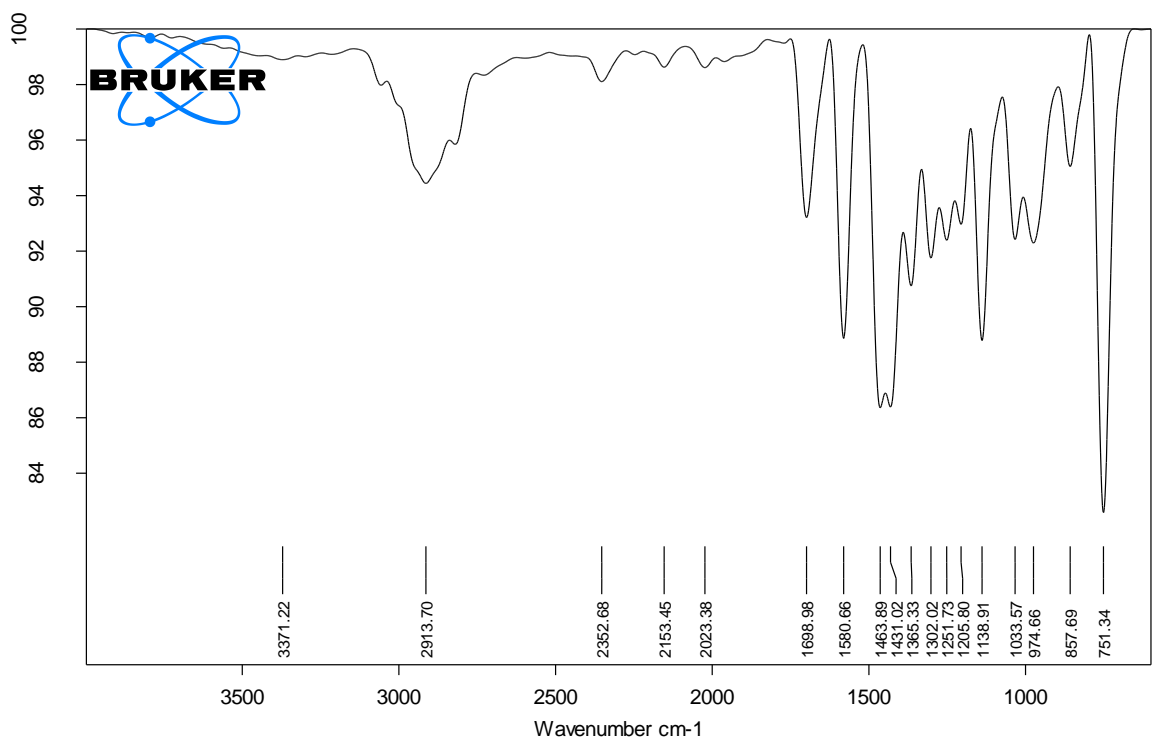

**Fig. S4.** FT-IR (Solid) spectrum of **L<sup>2</sup>**.

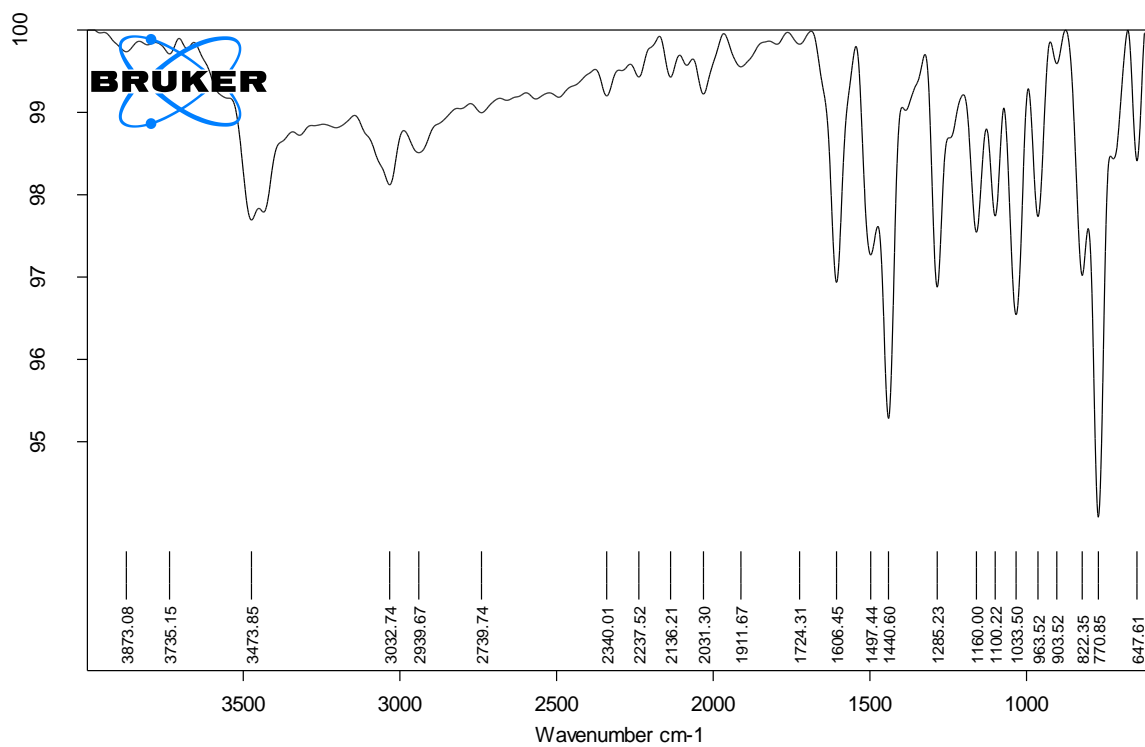

**Fig. S5.** FT-IR (Solid) spectrum of **1**.

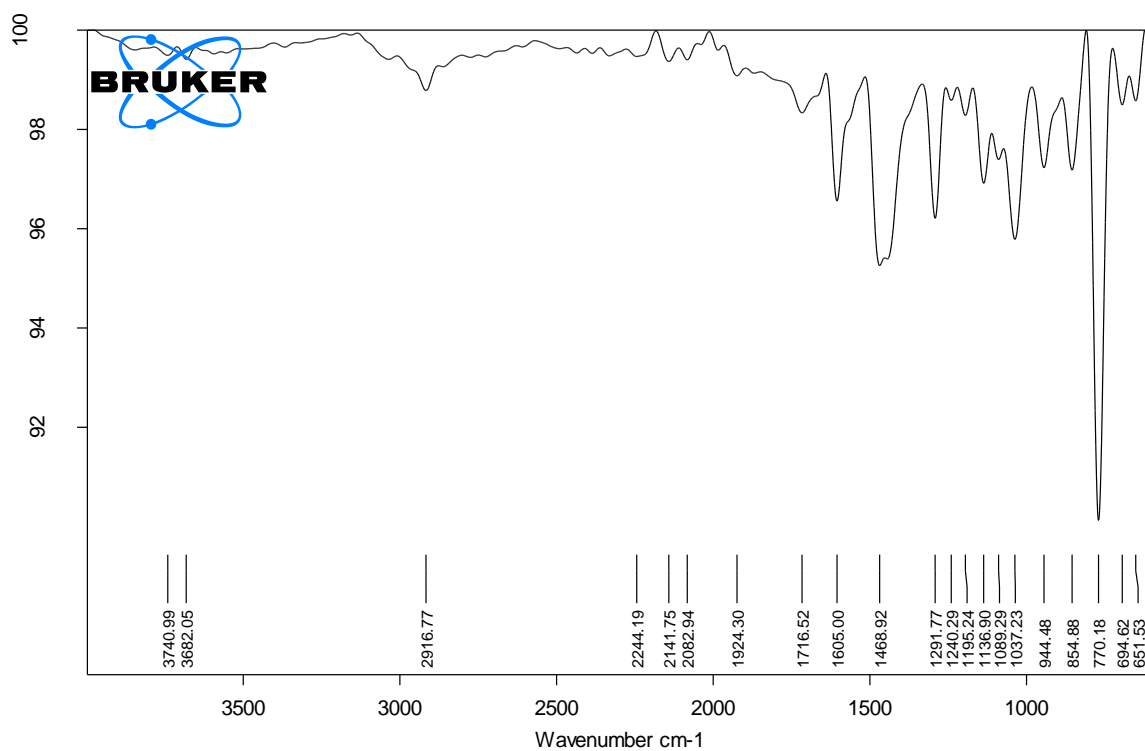

**Fig. S6.** FT-IR (Solid) spectrum of **2**.

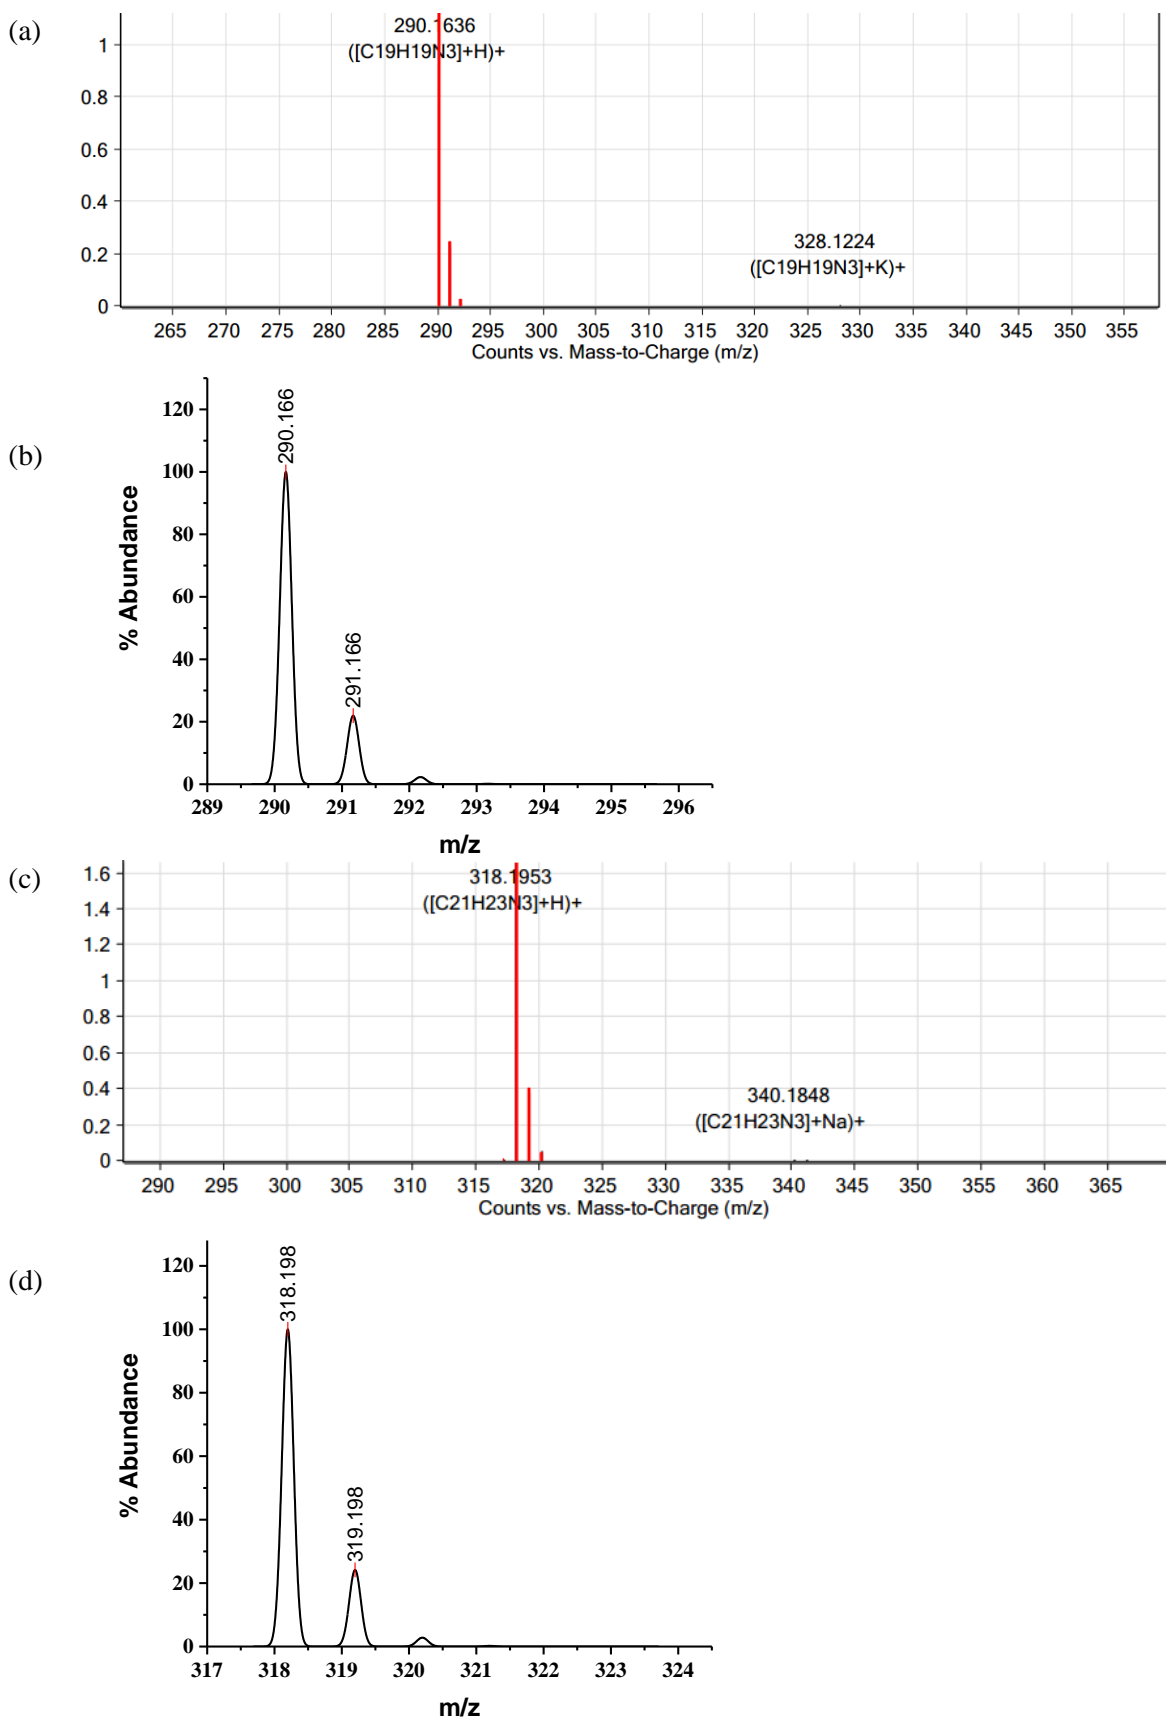

**Fig. S7.** HRMS spectra of  $L^1$  (a) experimental, (b) simulated and  $L^2$  (c) experimental, (d) simulated.

(a)

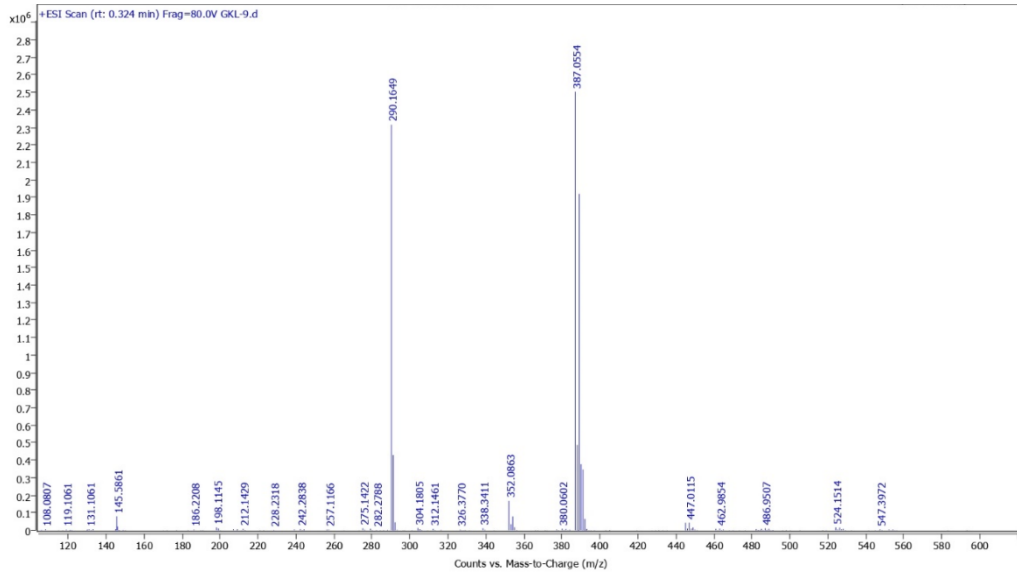

(b)

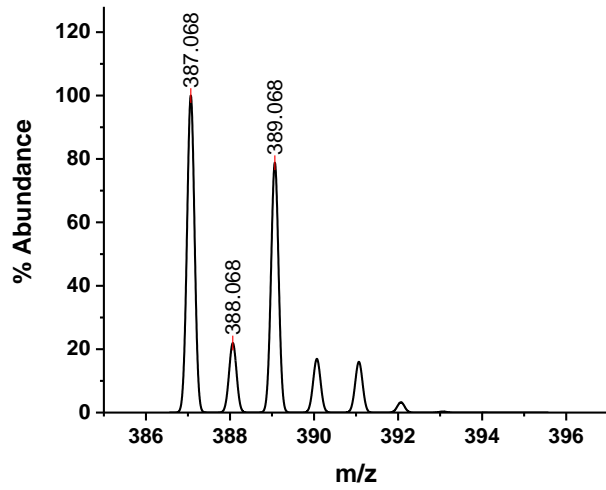

(c)

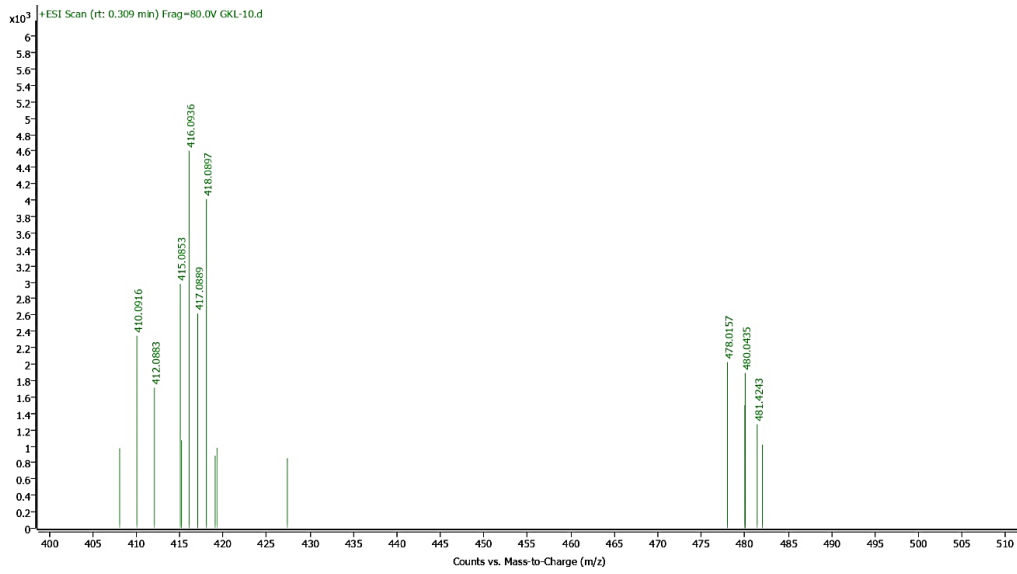

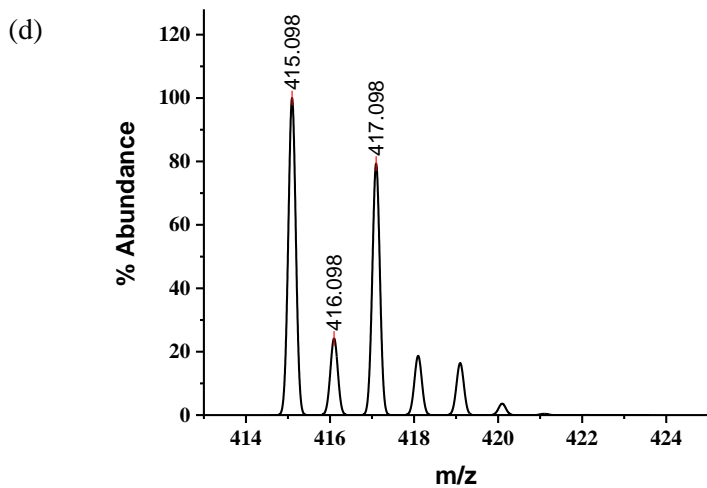

Fig. S8. HRMS spectra of **1** (a) experimental, (b) simulated and **2** (c) experimental, (d) simulated.

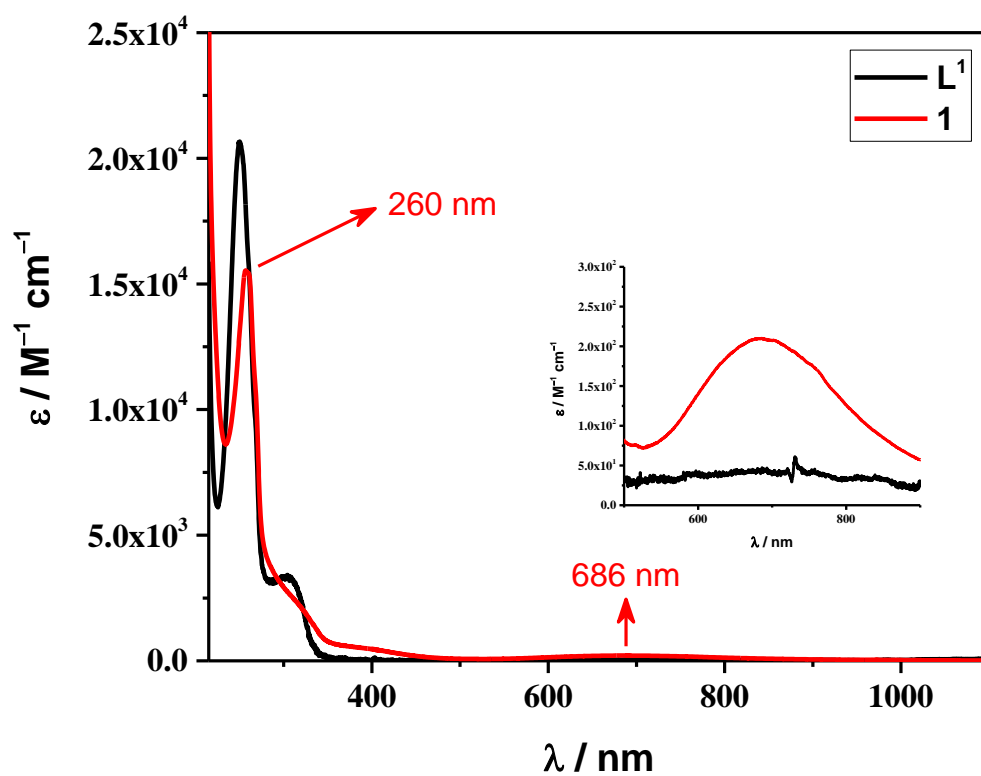

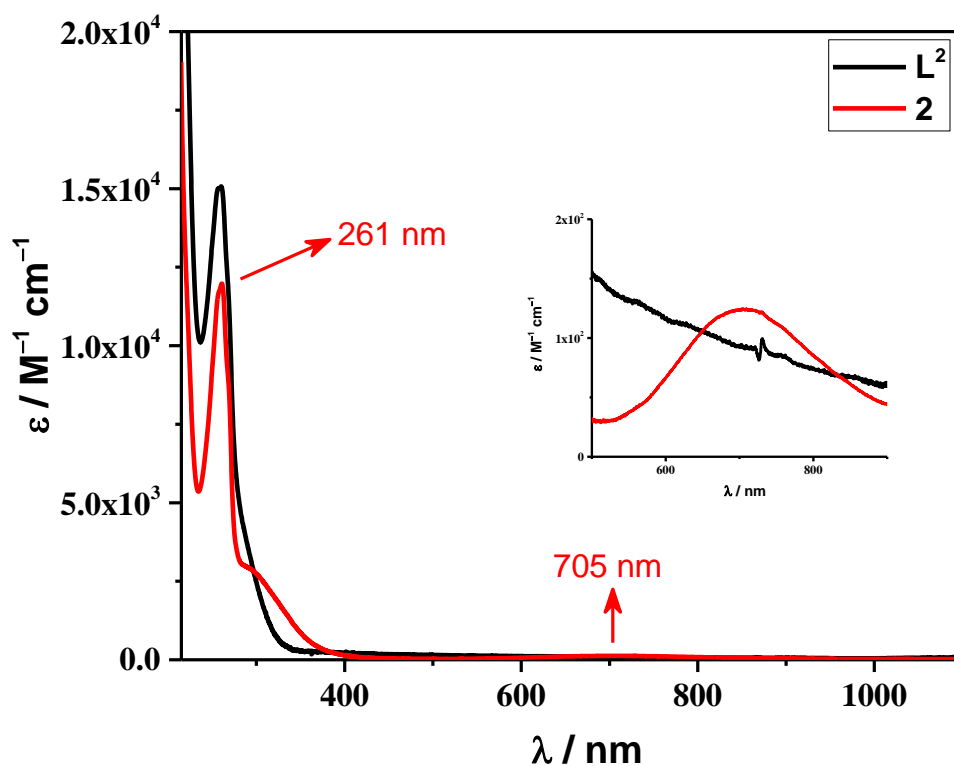

Fig. S9. Electronic spectra of  $L^1$ , **1** (top) and  $L^2$ , **2** (bottom) in methanol at room temperature.

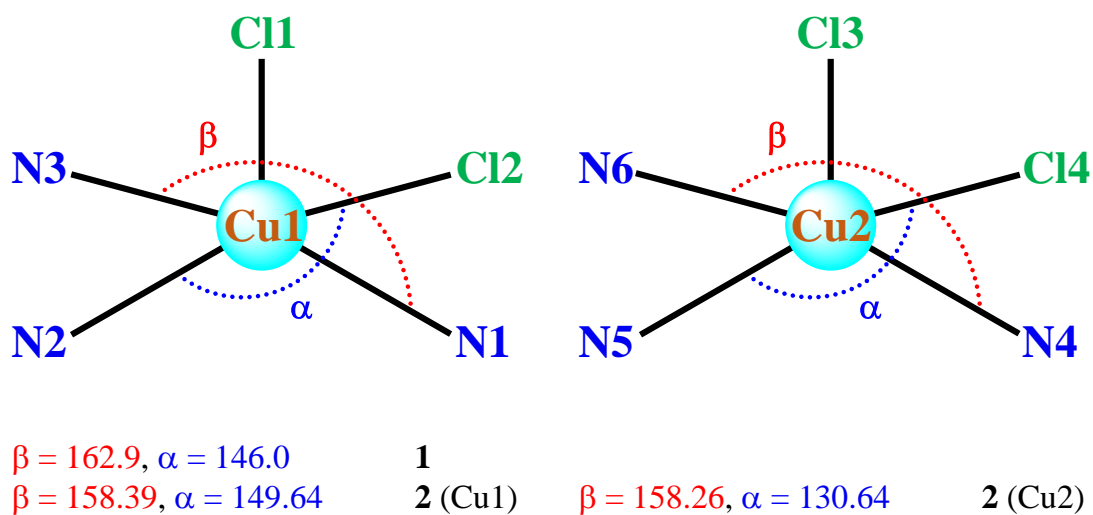

Fig. S10. Schematic representation of **1** and **2**



(a)

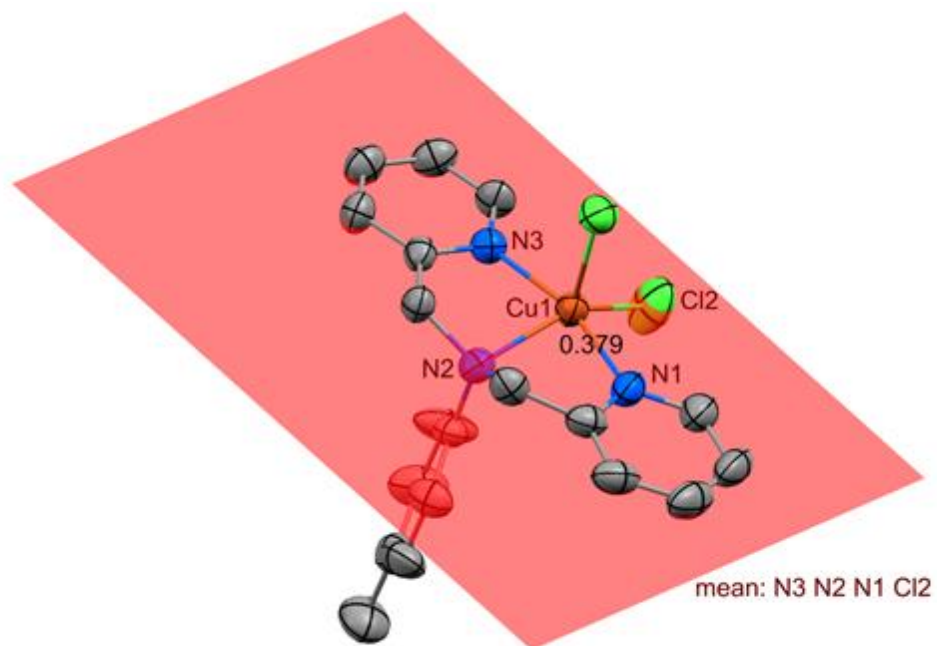

(b)

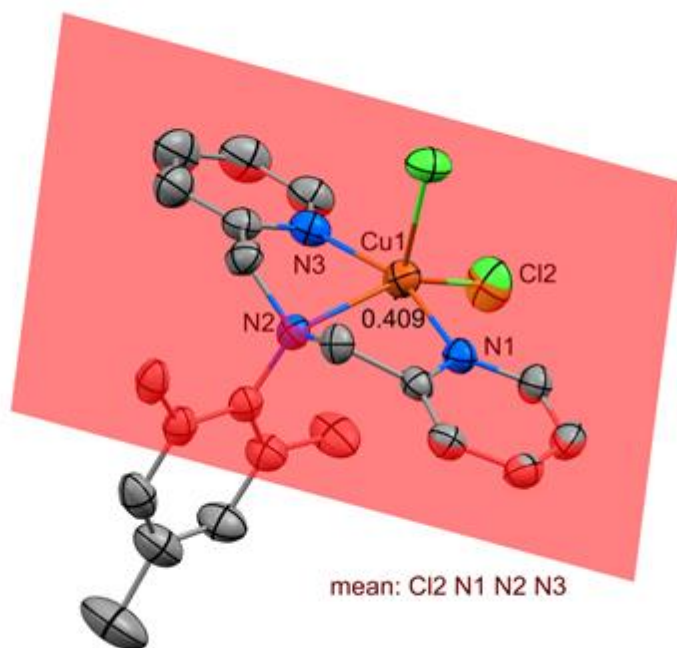

(c)

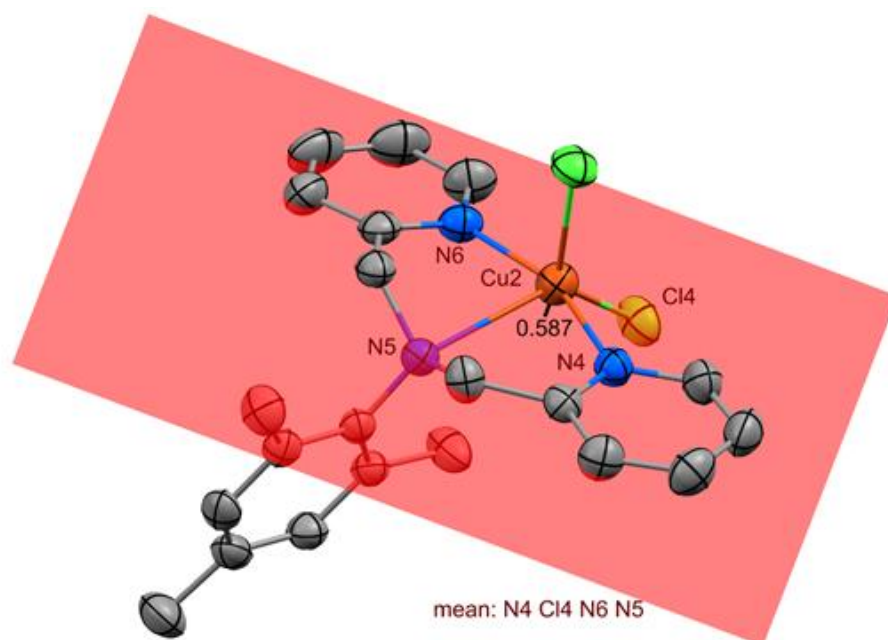

**Fig. S11.** The mean plane of copper ion sitting position in (a) **1** and (b) Cu1 center of **2** and (c) Cu2 center of **2**.

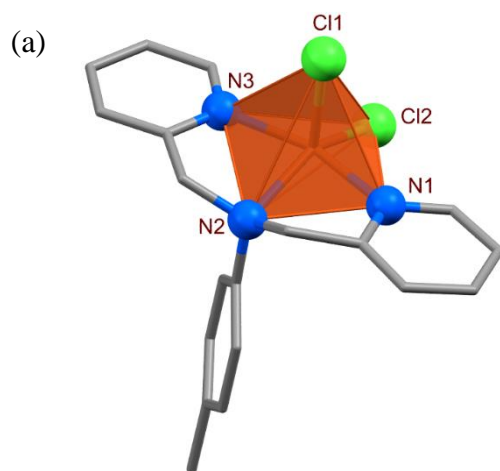

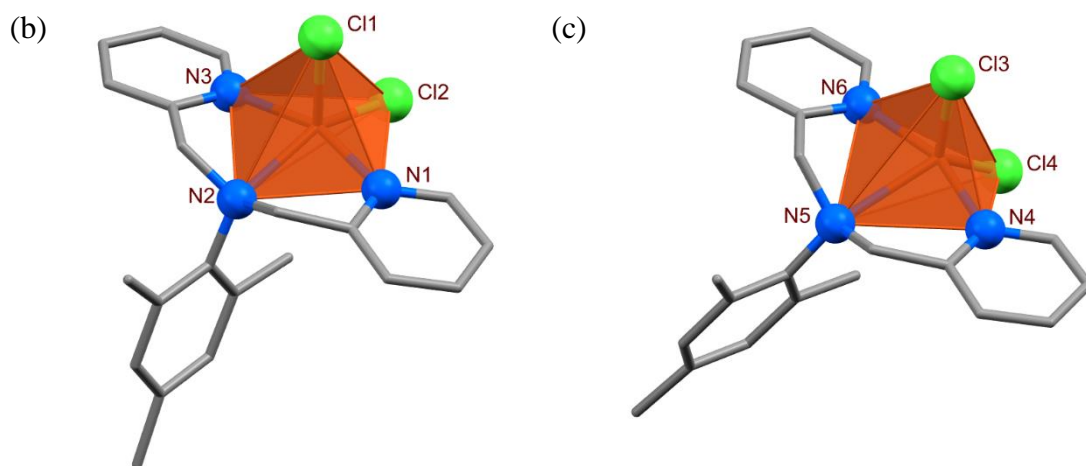

**Fig. S12.** The polyhedron view of (a) **1** and (b) Cu1 center and (c) Cu2 center of **2**.

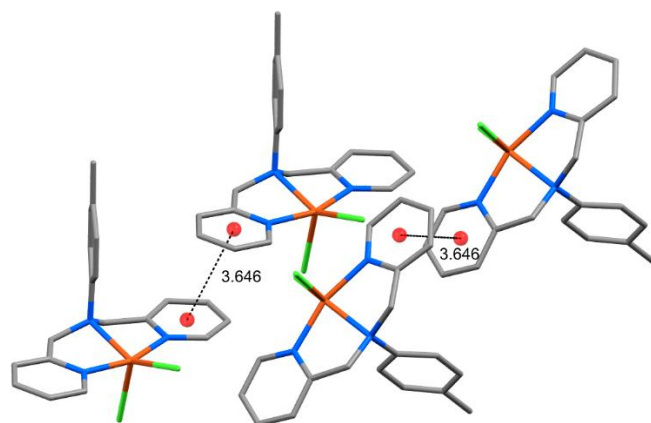

**Fig. S13.**  $\pi$ - $\pi$  stacking present in the crystal structures of **1**.

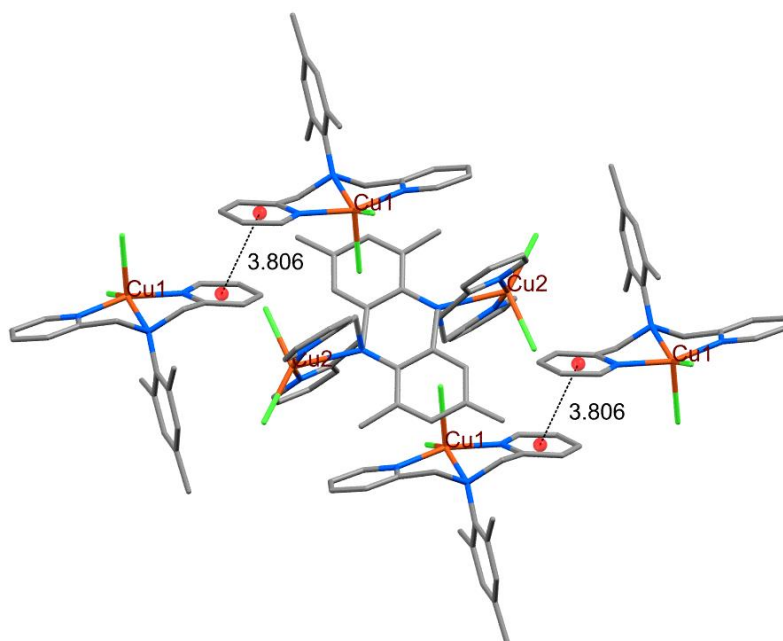

**Fig. S14.**  $\pi$ - $\pi$  stacking present in the crystal structures of **2** between Cu1 centers.

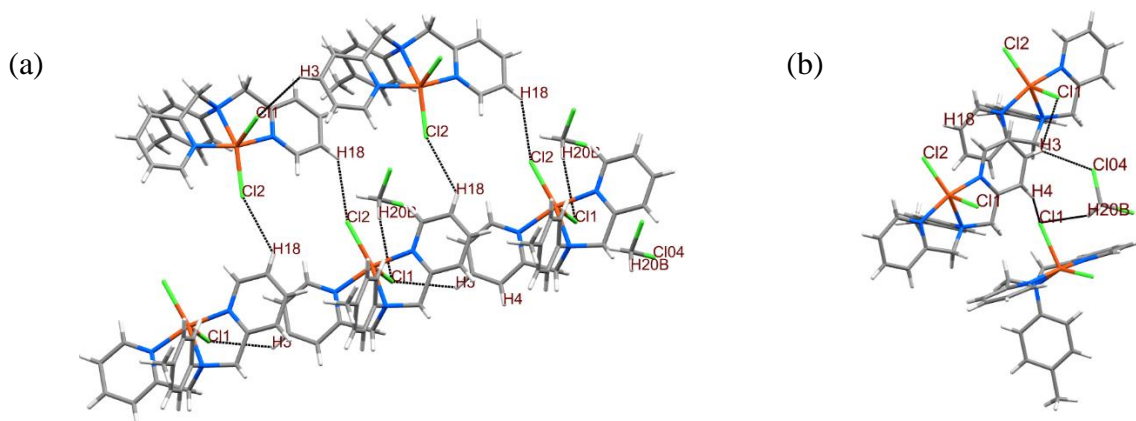

**Fig. S15.** (a) and (b) show the internuclear interactions present in the crystal structures of **1**.

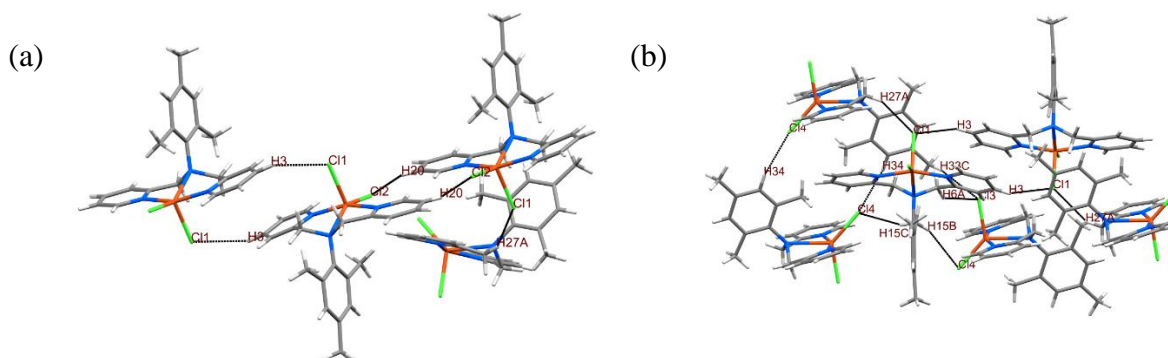

**Fig. S16.** Internuclear interactions present in the crystal structures of **2**.

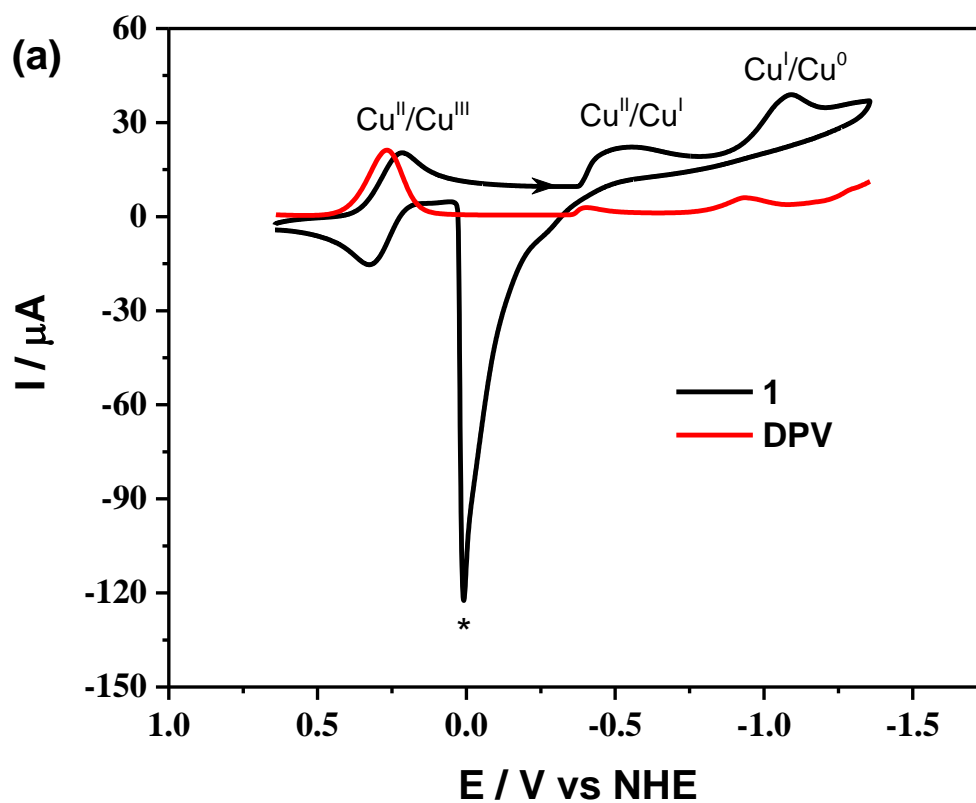

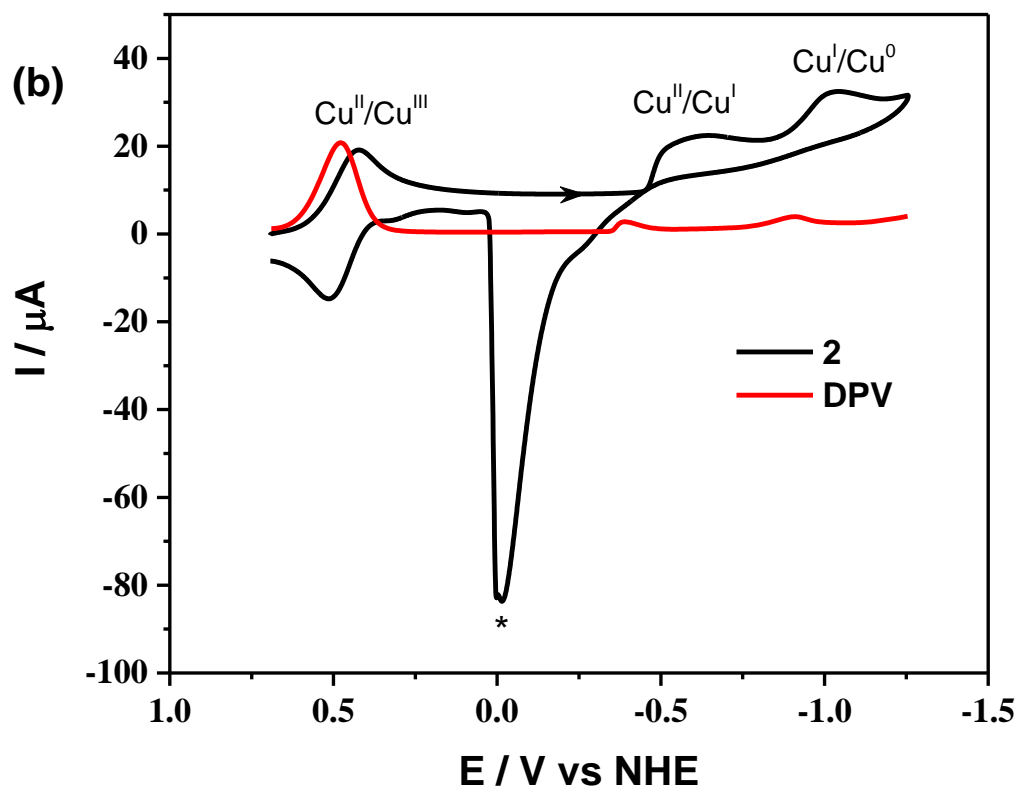

**Fig. S17.** CV and DPV of (a) **1** and (b) **2** in acetonitrile using 0.1 M TBAP as supporting electrolyte under argon atmosphere. The peak indicated by \* is the deposited copper, for  $\text{Cu}^0 \rightarrow \text{Cu}^I$  oxidation.

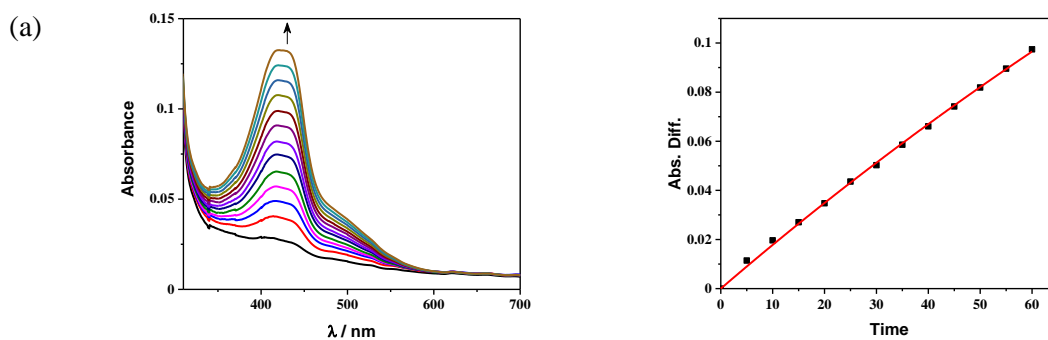

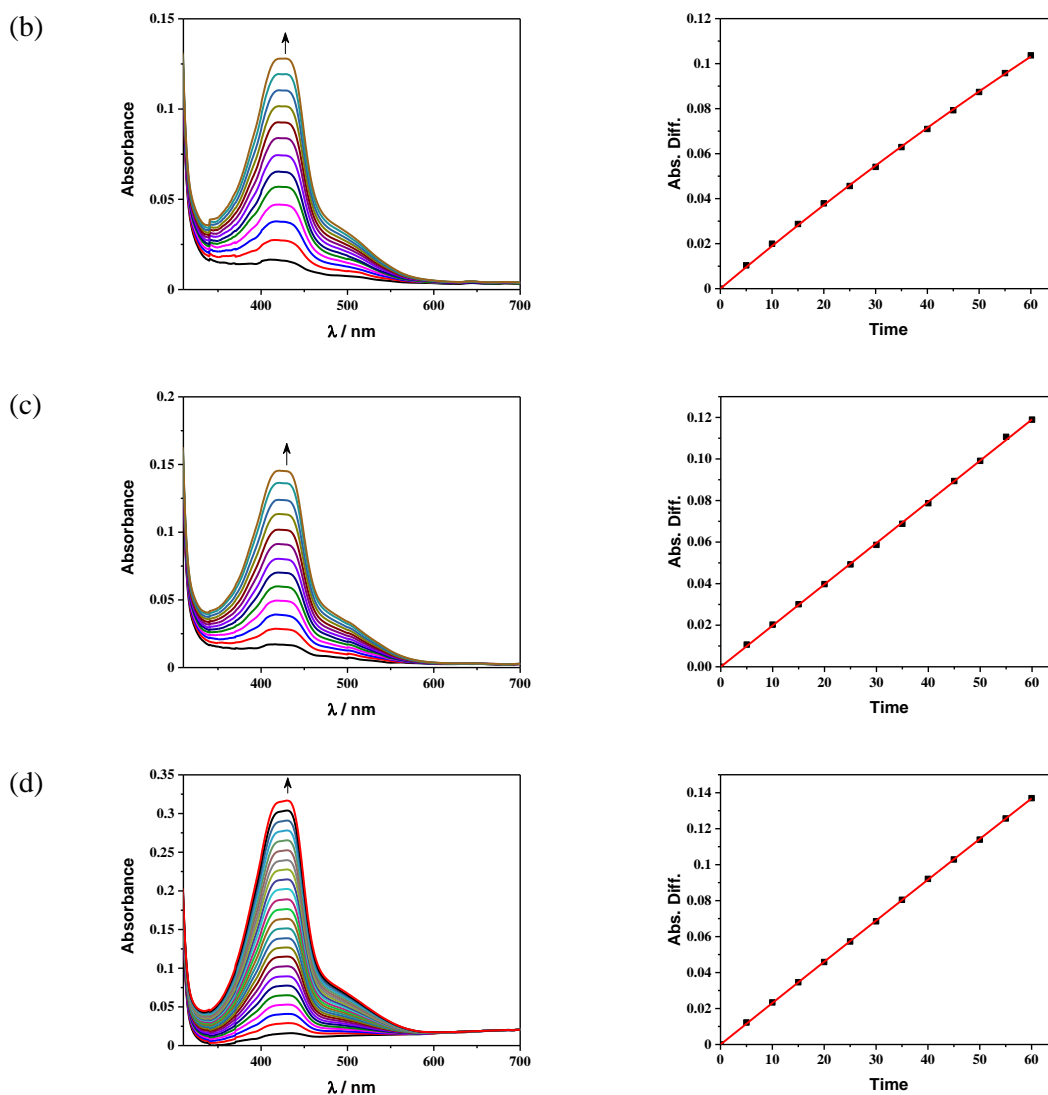

**Fig. S18.** Increase in phenoxazinone absorbance during the catalytic oxidation of (a)  $0.25 \times 10^{-2}$  M, (b)  $0.50 \times 10^{-2}$  M, (c)  $0.75 \times 10^{-2}$  M and (d)  $1.00 \times 10^{-2}$  M *o*-aminophenol with  $1 \times 10^{-4}$  M complex **1** at room temperature (25 °C) (left) and respective rate constant determination (right).

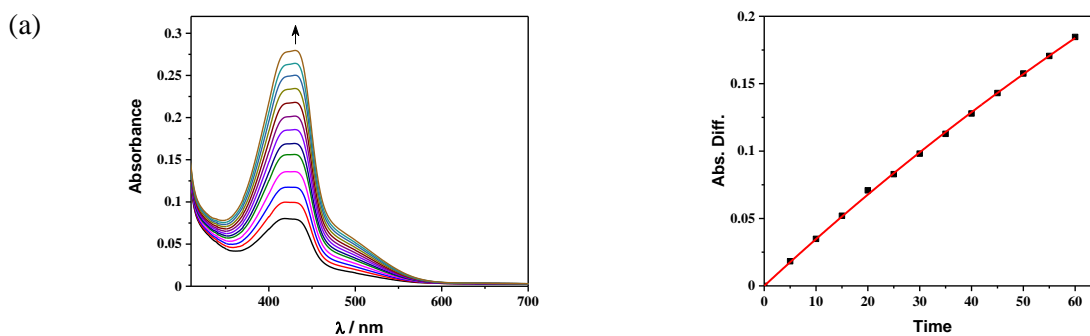

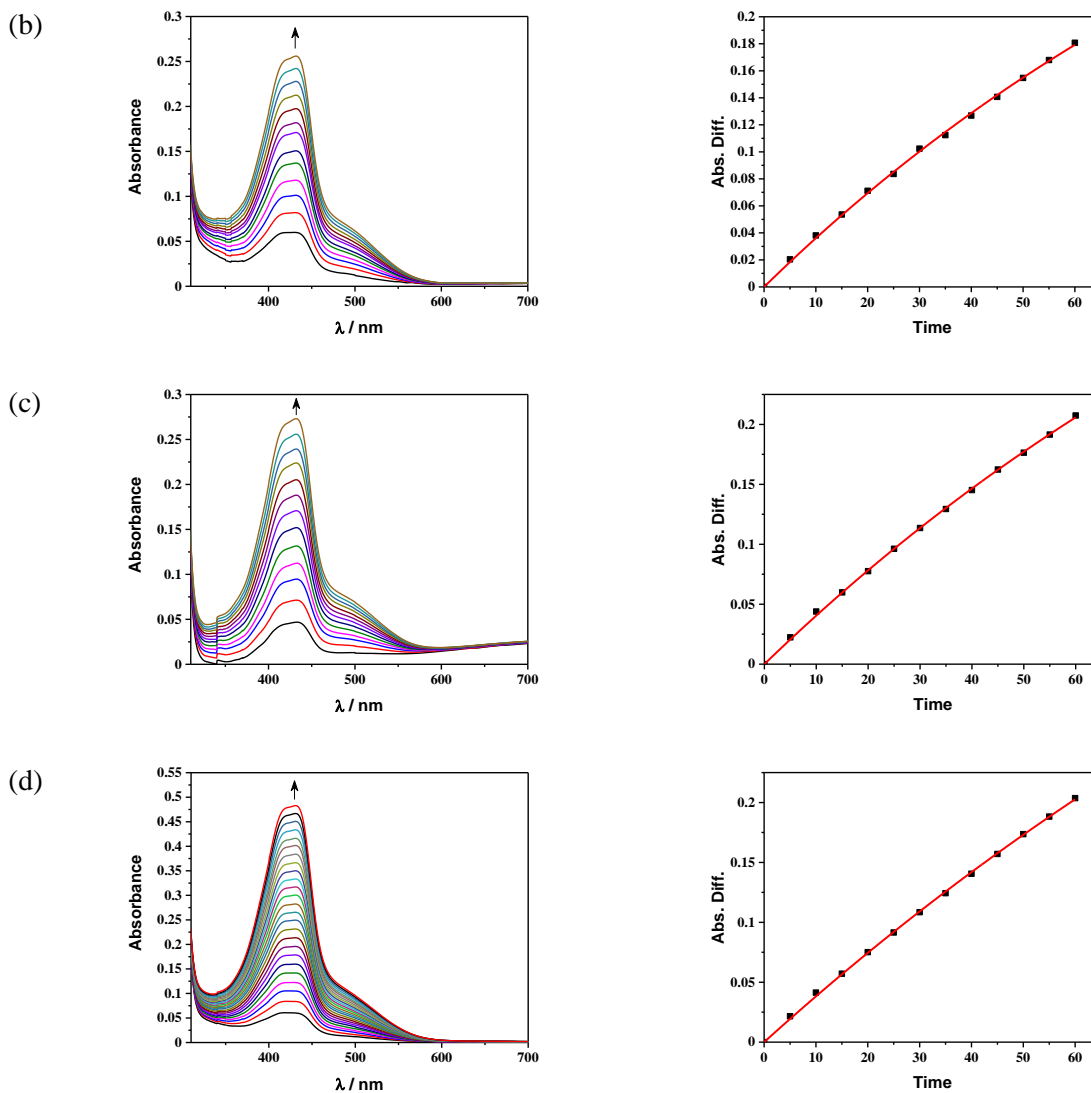

**Fig. S19.** Increase in phenoxazinone absorbance during the catalytic oxidation of (a)  $0.25 \times 10^{-2}$  M, (b)  $0.50 \times 10^{-2}$  M, (c)  $0.75 \times 10^{-2}$  M and (d)  $1.00 \times 10^{-2}$  M *o*-aminophenol with  $1 \times 10^{-4}$  M complex **2** at room temperature (25 °C) (left) and respective rate constant determination (right).

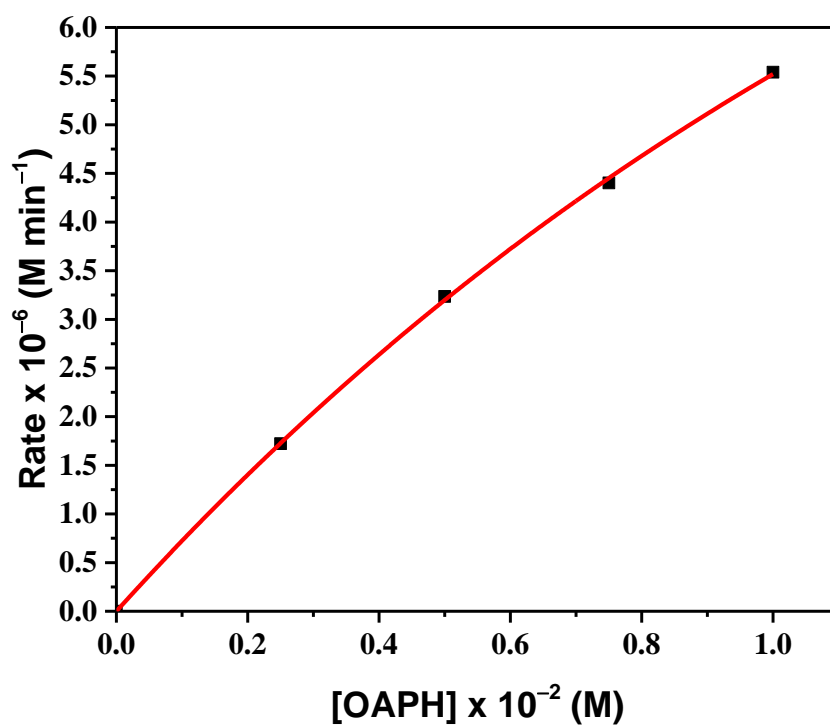

**Fig. S20.** Initial rate *versus* substrate concentration plot for the oxidation of *o*-aminophenol catalysed by **2** at room temperature (25 °C).

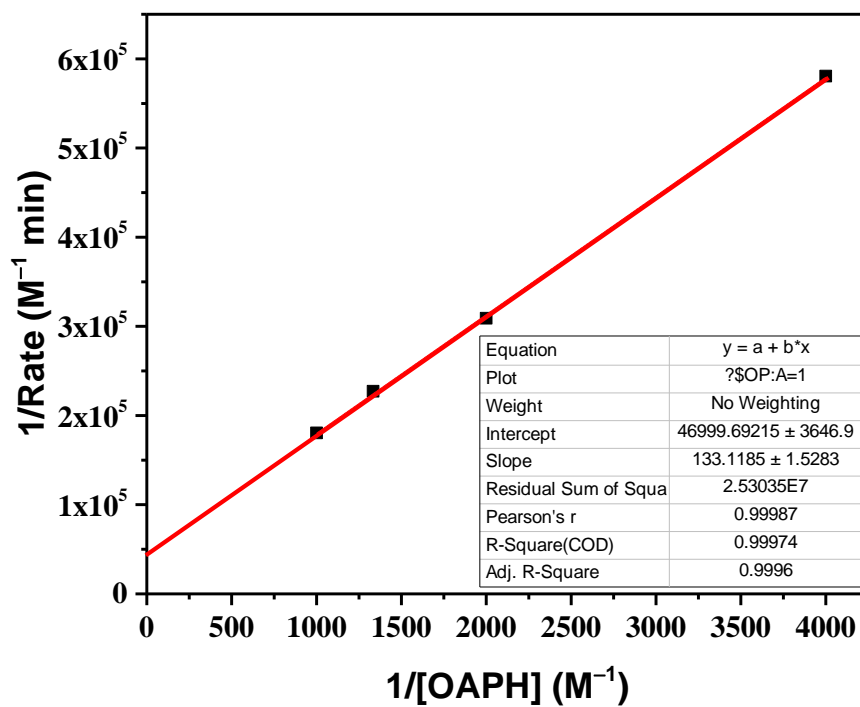

**Fig. S21.** Lineweaver-Burk plots for the oxidation of *o*-aminophenol catalysed by **2** at room temperature (25 °C).



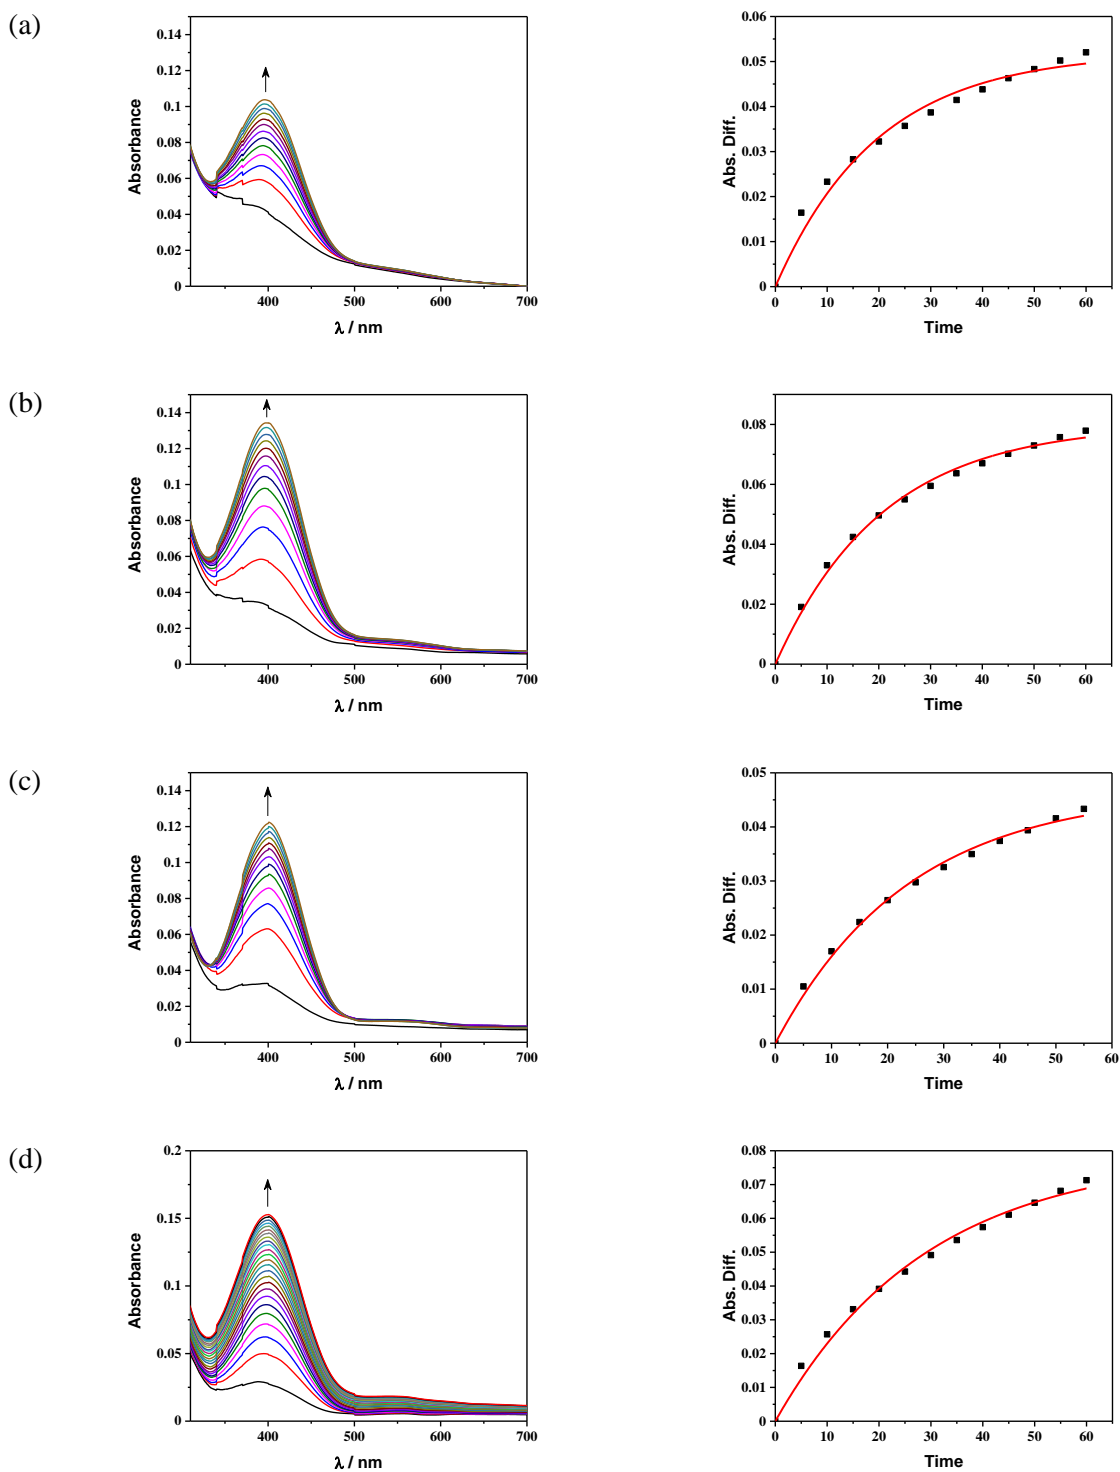

**Fig. S22.** Increase in quinone absorbance during the catalytic oxidation of (a)  $0.25 \times 10^{-3}$  M, (b)  $0.50 \times 10^{-3}$  M, (c)  $0.75 \times 10^{-3}$  M and (d)  $1.00 \times 10^{-3}$  M 3,5-DTBC with  $1 \times 10^{-5}$  M complex **1** at room temperature (25 °C) (left) and respective rate constant determination (right).

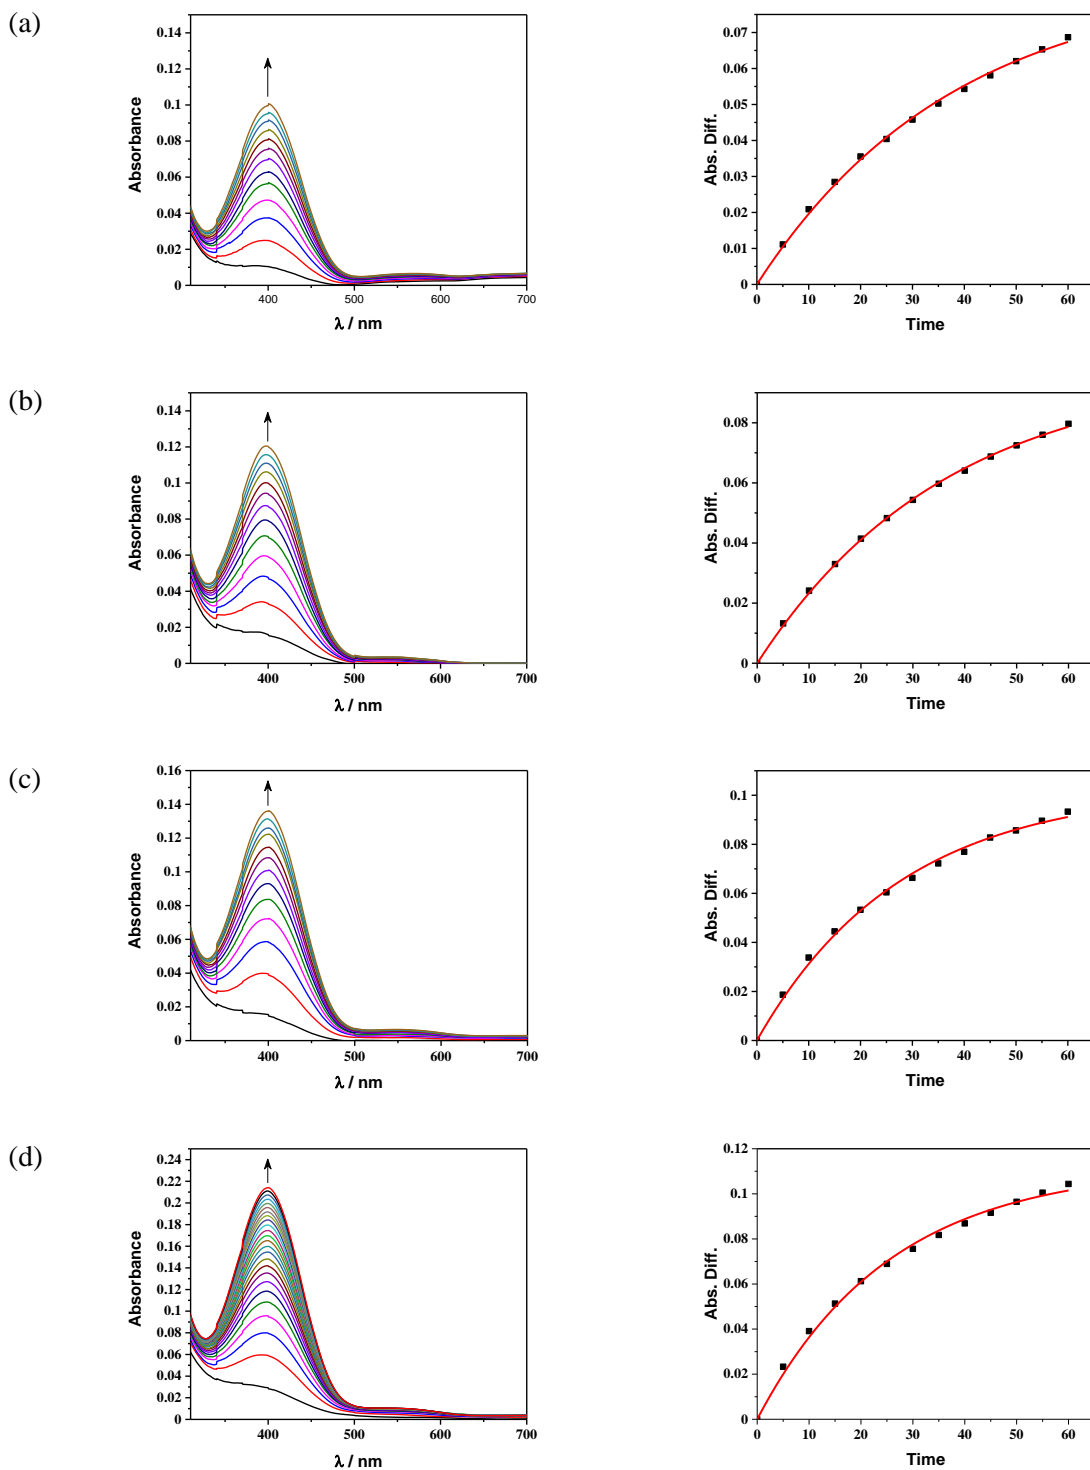

**Fig. S23.** Increase in quinone absorbance during the catalytic oxidation of (a)  $0.25 \times 10^{-3}$  M, (b)  $0.50 \times 10^{-3}$  M, (c)  $0.75 \times 10^{-3}$  M and (d)  $1.00 \times 10^{-3}$  M 3,5-DTBC with  $1 \times 10^{-5}$  M complex 2 at room temperature (25 °C) (left) and respective rate constant determination (right).

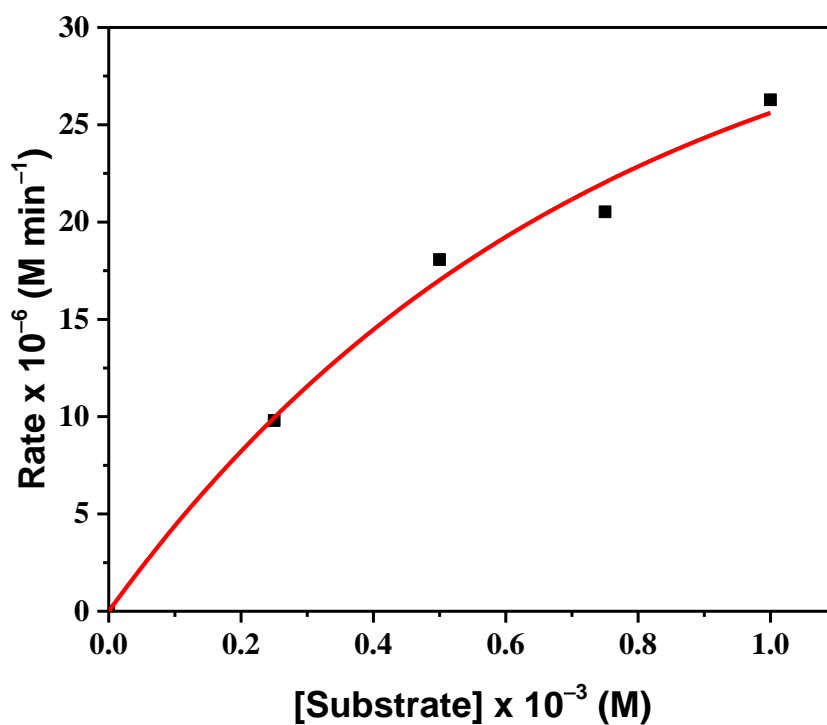

**Fig. S24.** Initial rate *versus* substrate concentration plot for the oxidation of 3,5-DTBC catalysed by **2** at room temperature (25 °C).

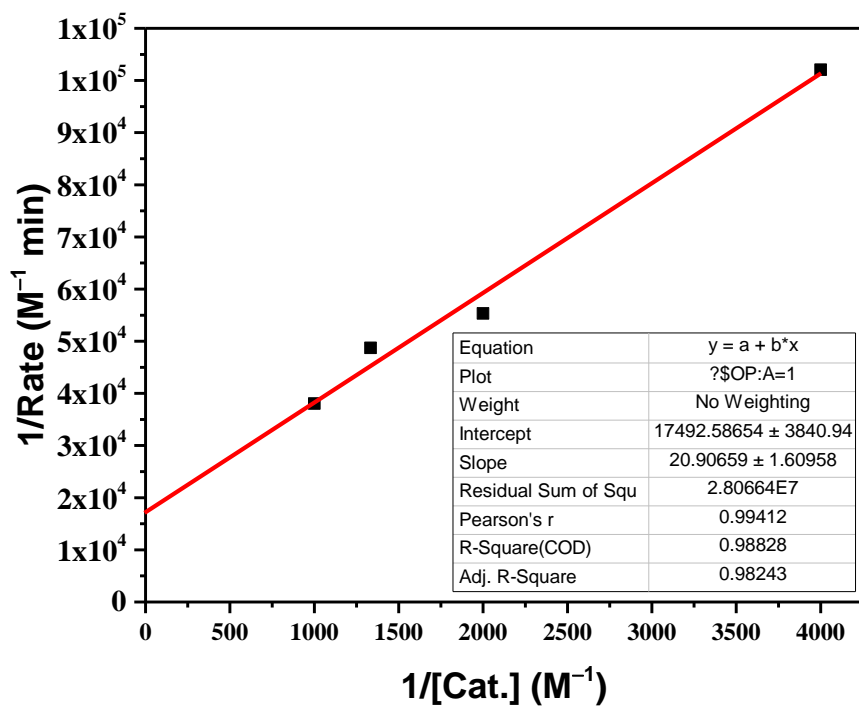

**Fig. S25.** Lineweaver-Burk plots for the oxidation of 3,5-DTBC catalysed by **2** at room temperature (25 °C).

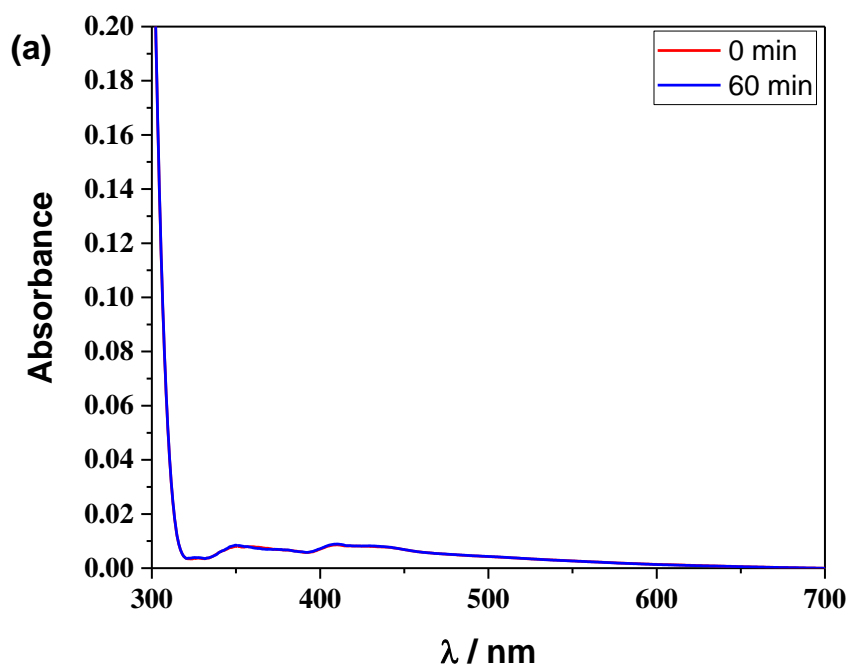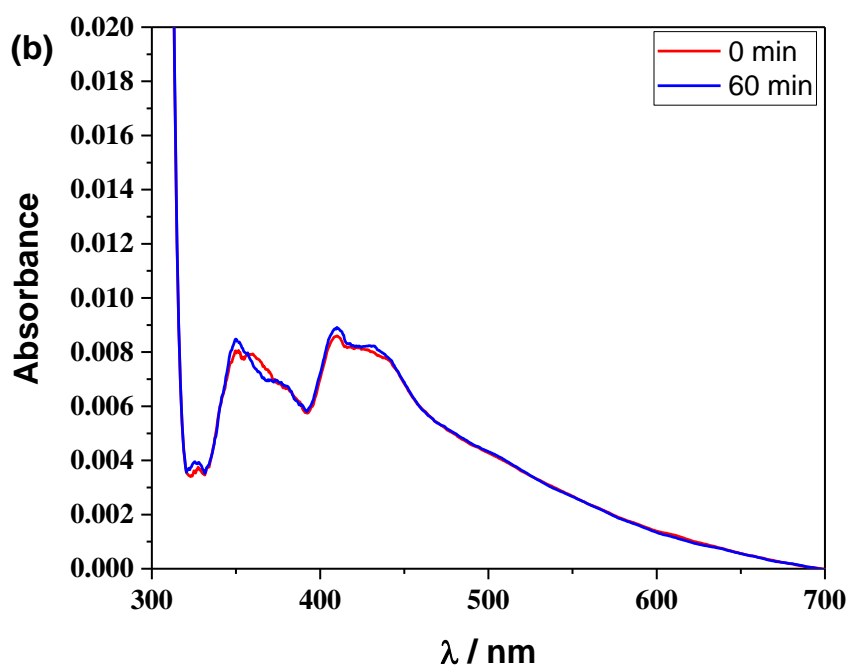

**Fig. S26.** *o*-aminophenol oxidation of  $1 \times 10^{-2}$  M substrate in methanol only (blank test) at room temperature (25 °C) (a) and zoomed version (b).

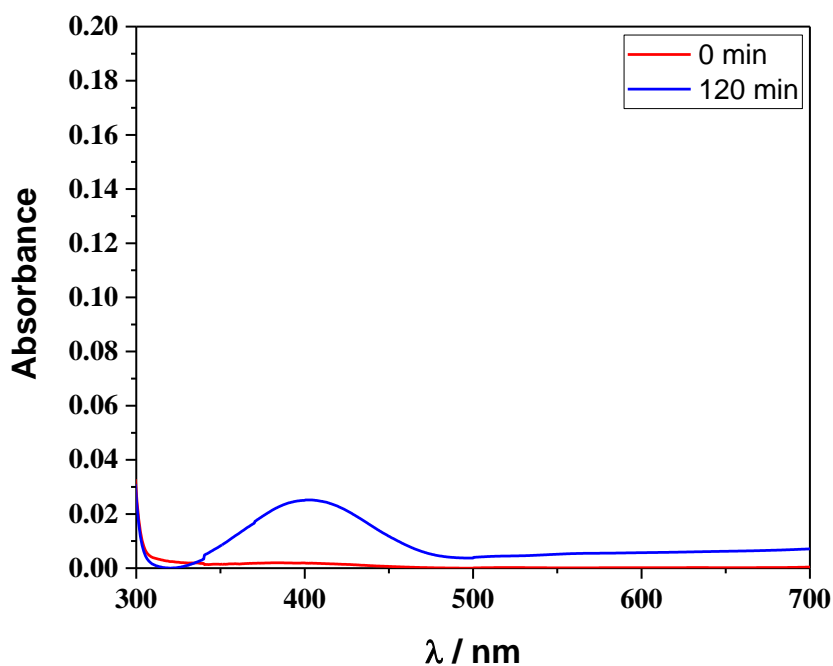

**Fig. S27.** 3,5-DTBC oxidation of  $1 \times 10^{-3}$  M substrate in methanol only (blank test) at room temperature (25 °C).

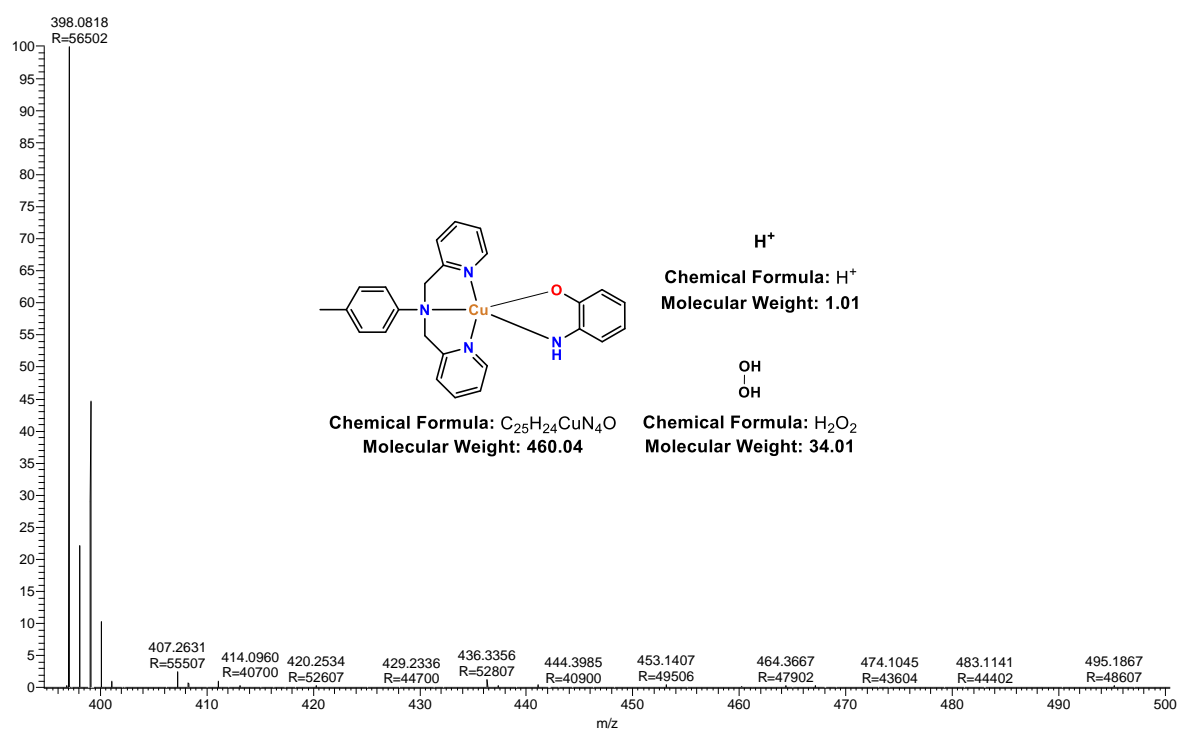

**Fig. S28.** Evidence of adduct formation along with peroxide in case of *o*-aminophenol oxidation catalysed by **1** found via mass spectrometry.

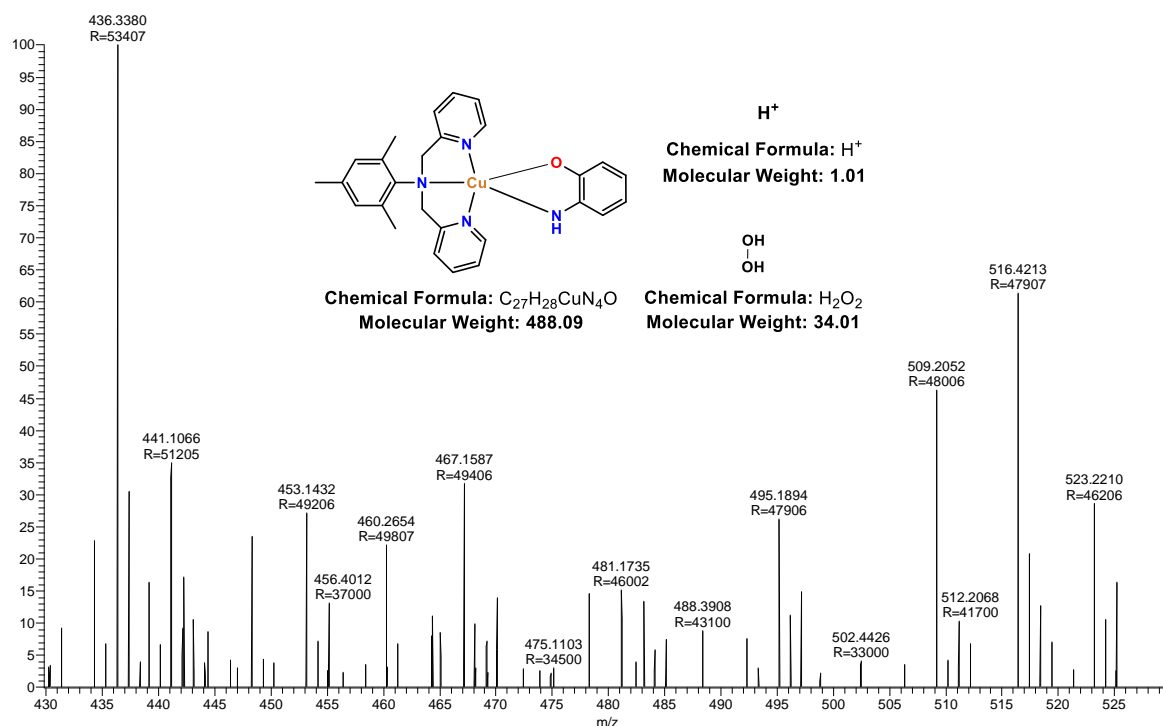

**Fig. S29.** Evidence of adduct formation along with peroxide in case of *o*-aminophenol oxidation catalysed by **2** found via mass spectrometry.

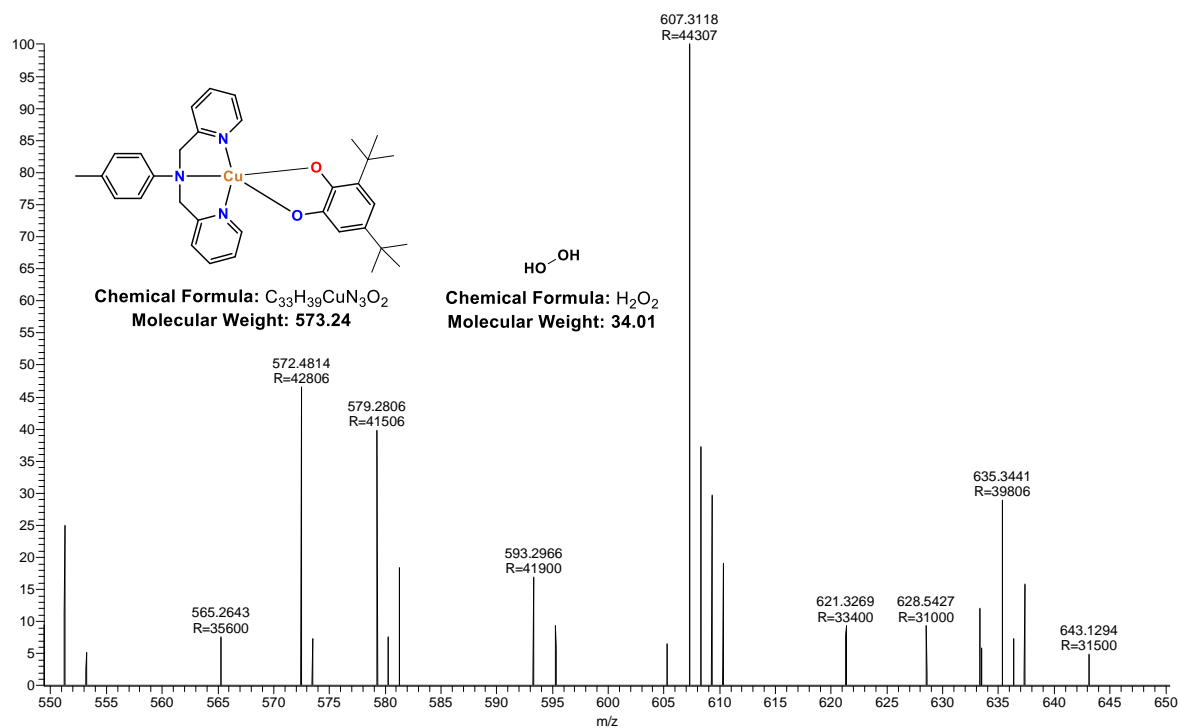

**Fig. S30.** Evidence of adduct formation along with peroxide in case of 3,5-DTBC oxidation catalysed by **1** found via mass spectrometry.

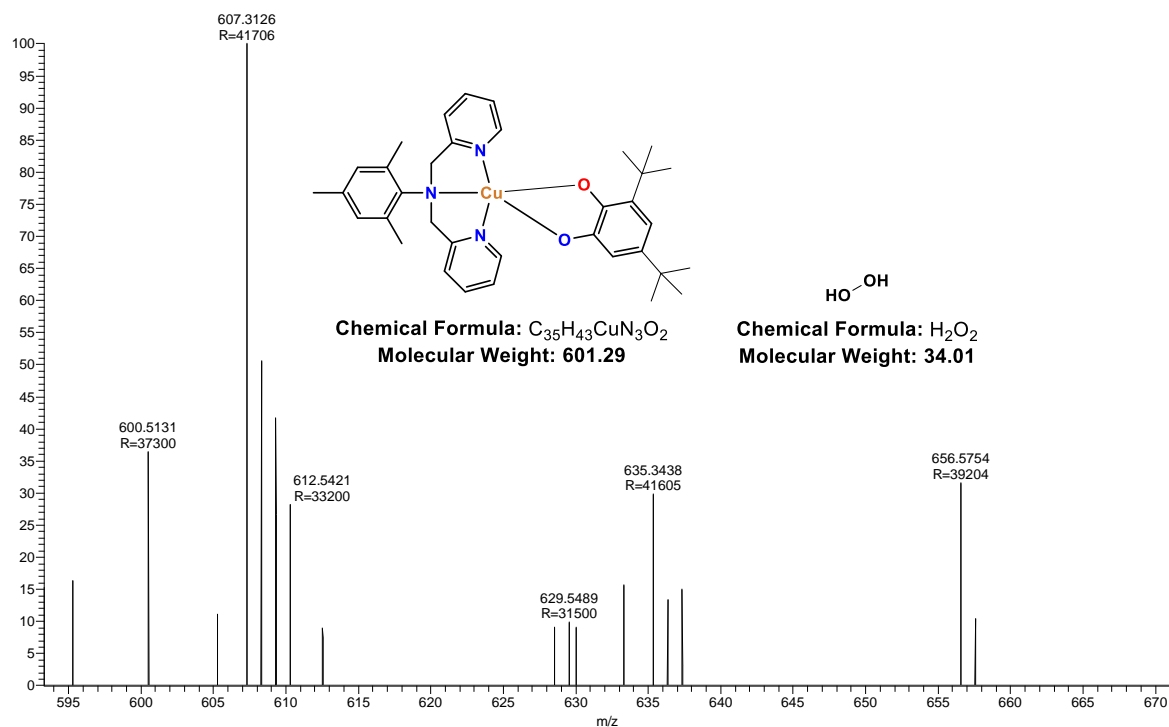

**Fig. S31.** Evidence of adduct formation along with peroxide in case of 3,5-DTBC oxidation catalysed by **2** found via mass spectrometry.

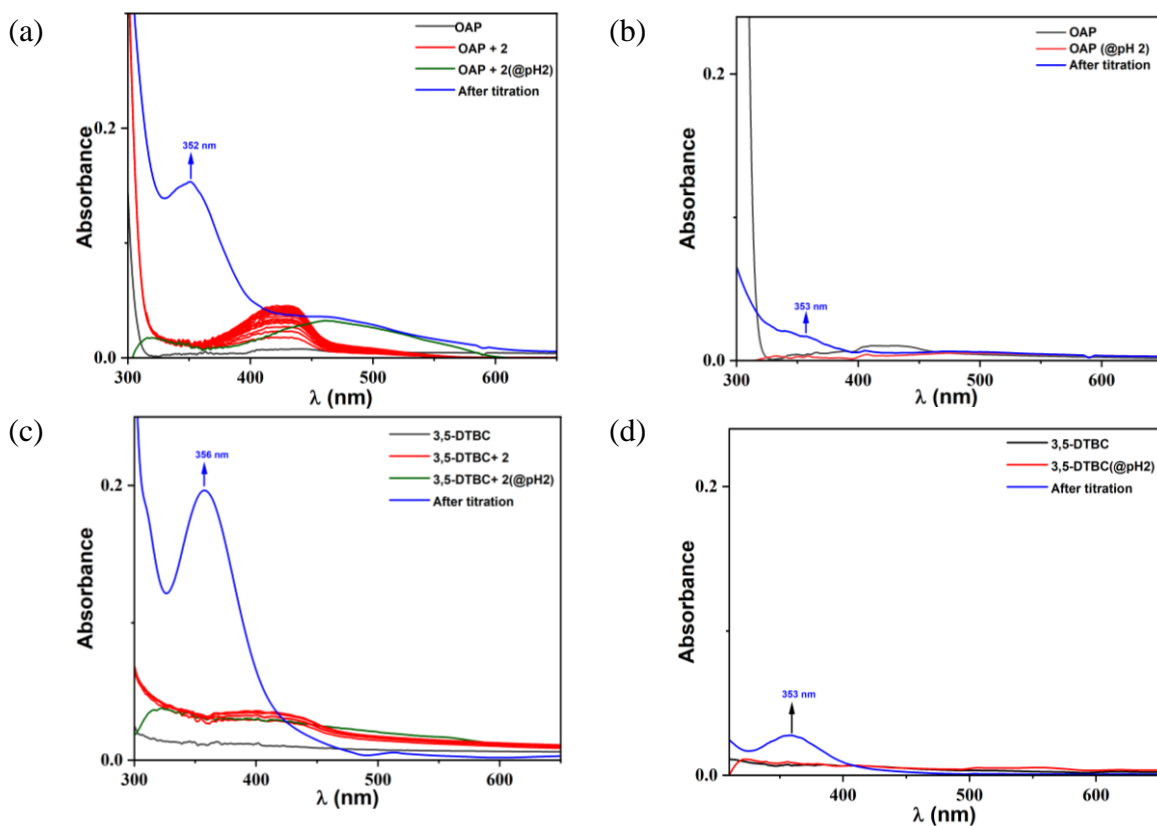

**Fig. 32.** Iodometric titration for the detection of  $H_2O_2$  in case of (a) *o*-aminophenol and (c) 3,5-DTBC with **2** at 25 °C. (b) and (d) denotes the respective control experiments.

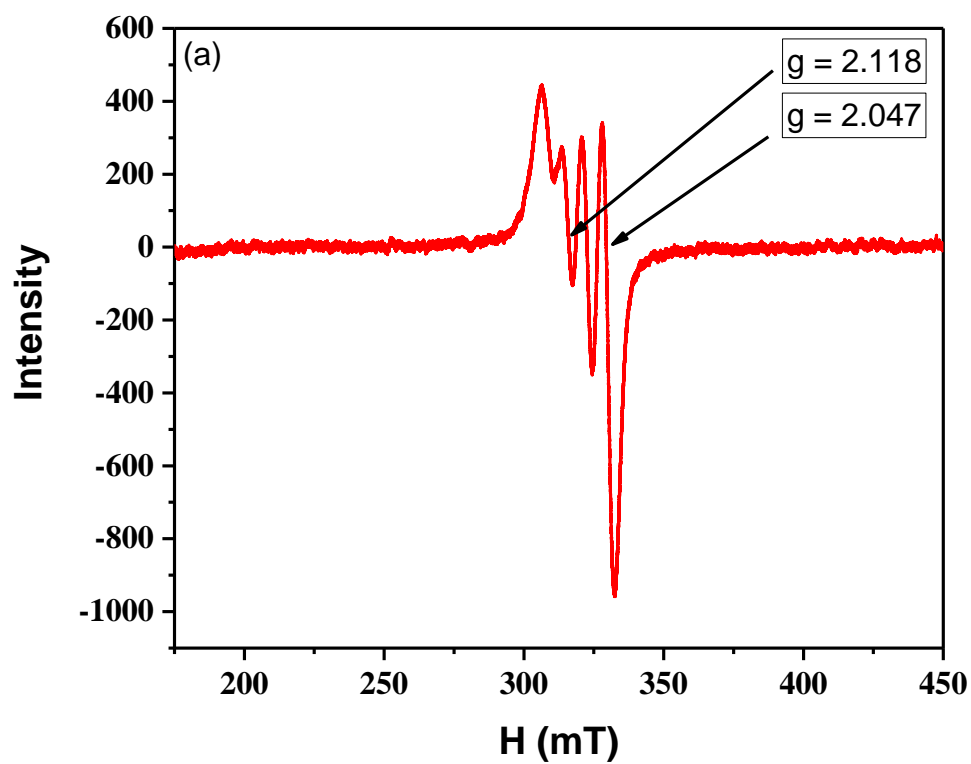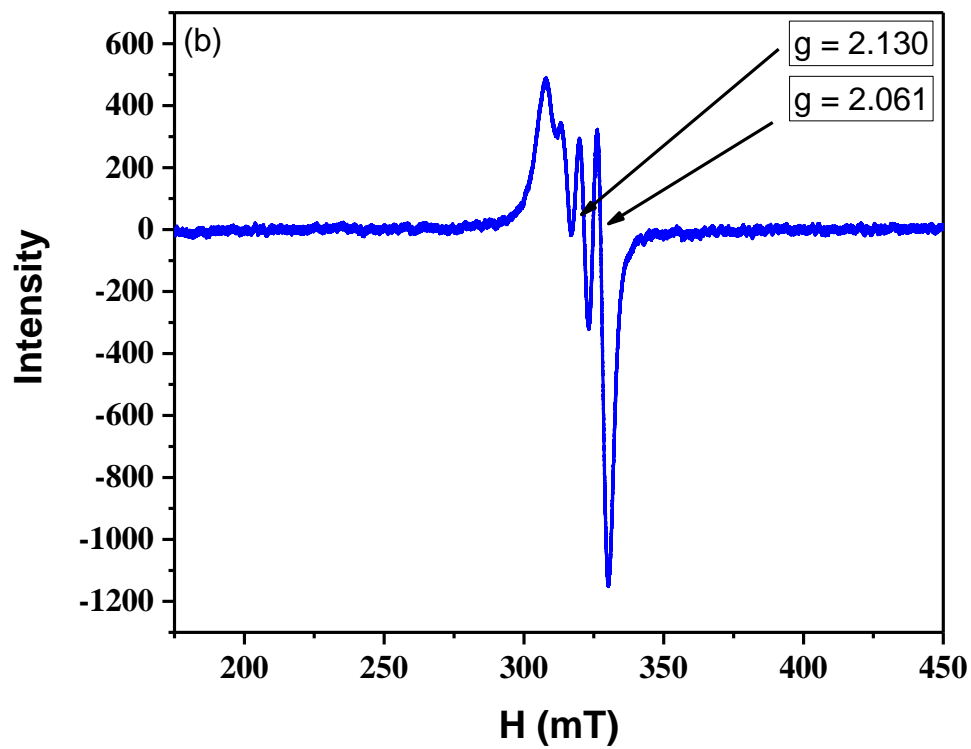

**Fig. S33.** EPR spectra of (a) 10:1 3,5-DTBC with **1** in methanol and (b) 10:1 3,5-DTBC with **2** in methanol at 298 K.
